# Supplementary material for: Different gene expressions are associated with the different molecular subtypes of inflammatory breast cancer
Source: Springer Nature journal article supplement (doi:10.1007/s10549-010-1280-6), 2010-12-08
Supplement: MOESM1 [file 10549_2010_1280_MOESM1_ESM.xls]

## Sheet: gene sets tested
Supplementary Table 1. Prior defined gene sets
Wnt gene set1 (N=17)
	Probe set	Gene symbol	Description
1	201700_at	CCND3	cyclin D3
2	207416_s_at	MYCL1	v-myc myelocytomatosis viral oncogene homolog 1, lung carcinoma derived (avian)
3	205522_at	ACVRL1	activin A receptor type II-like 1
4	214058_at	GNAQ	guanine nucleotide binding protein (G protein), q polypeptide
5	215491_at	HOXA7	homeobox A7
6	210555_s_at	GNAQ	guanine nucleotide binding protein (G protein), q polypeptide
7	205792_at	HOXB5	homeobox B5
8	202615_at	NFATC3	nuclear factor of activated T-cells, cytoplasmic, calcineurin-dependent 3
9	206848_at	NFATC3	nuclear factor of activated T-cells, cytoplasmic, calcineurin-dependent 3
10	205601_s_at	HOXB5	homeobox B5
11	211426_x_at	LRP5	low density lipoprotein receptor-related protein 5
12	209468_at	HOXD4	homeobox D4
13	206847_s_at	HDAC1	histone deacetylase 1
14	210838_s_at	MYCL1	v-myc myelocytomatosis viral oncogene homolog 1, lung carcinoma derived (avian)
15	205600_x_at	WISP2	WNT1 inducible signaling pathway protein 2
16	210556_at	NFATC3	nuclear factor of activated T-cells, cytoplasmic, calcineurin-dependent 3
17	201209_at	HOXA7	homeobox A7
Laere genes2 (N=36)
	Probe set	Gene symbol	Description
1	200059_s_at	RHOA	ras homolog gene family, member A
2	212885_at	MPHOSPH10	M-phase phosphoprotein 10 (U3 small nucleolar ribonucleoprotein)
3	209879_at	SELPLG	selectin P ligand
4	207569_at	ROS1	c-ros oncogene 1 , receptor tyrosine kinase
5	206470_at	PLXNC1	plexin C1
6	204759_at	RCBTB2	regulator of chromosome condensation (RCC1) and BTB (POZ) domain containing protein 2
7	220085_at	HELLS	helicase, lymphoid-specific
8	201115_at	POLD2	polymerase (DNA directed), delta 2, regulatory subunit 50kDa
9	204834_at	FGL2	fibrinogen-like 2
10	218589_at	P2RY5	purinergic receptor P2Y, G-protein coupled, 5
11	207302_at	SGCG	sarcoglycan, gamma (35kDa dystrophin-associated glycoprotein)
12	201852_x_at	COL3A1	collagen, type III, alpha 1
13	205821_at	KLRK1	killer cell lectin-like receptor subfamily K, member 1
14	209193_at	PIM1	pim-1 oncogene
15	204478_s_at	RABIF	RAB interacting factor
16	203186_s_at	S100A4	S100 calcium binding protein A4
17	210004_at	OLR1	oxidized low density lipoprotein (lectin-like) receptor 1
18	202988_s_at	RGS1	regulator of G-protein signaling 1
19	205675_at	MTTP	microsomal triglyceride transfer protein
20	207233_s_at	MITF	microphthalmia-associated transcription factor
21	208536_s_at	BCL2L11	BCL2-like 11 (apoptosis facilitator)
22	203859_s_at	PALM	paralemmin
23	204981_at	SLC22A18	solute carrier family 22, member 18
24	210838_s_at	ACVRL1	activin A receptor type II-like 1
25	202490_at	IKBKAP	inhibitor of kappa light polypeptide gene enhancer in B-cells, kinase complex-associated protein
26	202433_at	SLC35B1	solute carrier family 35, member B1
27	203913_s_at	HPGD	hydroxyprostaglandin dehydrogenase 15-(NAD)
28	205405_at	SEMA5A	sema domain, seven thrombospondin repeats (type 1 and type 1-like), transmembrane domain (TM) and short cytoplasmic domain, (semaphorin) 5A
29	200846_s_at	PPP1CA	protein phosphatase 1, catalytic subunit, alpha isoform
30	208050_s_at	CASP2	caspase 2, apoptosis-related cysteine peptidase
31	204517_at	PPIC	peptidylprolyl isomerase C (cyclophilin C)
32	206022_at	NDP	Norrie disease (pseudoglioma)
33	206662_at	GLRX	glutaredoxin (thioltransferase)
34	206086_x_at	HFE	hemochromatosis
35	205282_at	LRP8	low density lipoprotein receptor-related protein 8, apolipoprotein e receptor
36	203978_at	NUBP1	nucleotide binding protein 1 (MinD homolog, E. coli)
Bieche genes3 (N=54)
	Probe set	Gene symbol	Description
1	222076_at	HBEGF	heparin-binding EGF-like growth factor
2	336_at	TBXA2R	thromboxane A2 receptor
3	203904_x_at	CD82	CD82 molecule
4	203887_s_at	THBD	thrombomodulin
5	211590_x_at	TBXA2R	thromboxane A2 receptor
6	205027_s_at	MAP3K8	mitogen-activated protein kinase kinase kinase 8
7	212022_s_at	MKI67	antigen identified by monoclonal antibody Ki-67
8	205581_s_at	NOS3	nitric oxide synthase 3 (endothelial cell)
9	211234_x_at	ESR1	estrogen receptor 1
10	201041_s_at	DUSP1	dual specificity phosphatase 1
11	219480_at	SNAI1	snail homolog 1 (Drosophila)
12	215552_s_at	ESR1	estrogen receptor 1
13	201162_at	IGFBP7	insulin-like growth factor binding protein 7
14	201694_s_at	EGR1	early growth response 1
15	211233_x_at	ESR1	estrogen receptor 1
16	213281_at	JUN	jun oncogene
17	210550_s_at	RASGRF1	Ras protein-specific guanine nucleotide-releasing factor 1
18	212020_s_at	MKI67	antigen identified by monoclonal antibody Ki-67
19	201163_s_at	IGFBP7	insulin-like growth factor binding protein 7
20	205767_at	EREG	epiregulin
21	38037_at	HBEGF	heparin-binding EGF-like growth factor
22	215551_at	ESR1	estrogen receptor 1
23	209757_s_at	MYCN	v-myc myelocytomatosis viral related oncogene, neuroblastoma derived (avian)
24	203683_s_at	VEGFB	vascular endothelial growth factor B
25	203888_at	THBD	thrombomodulin
26	215688_at	RASGRF1	Ras protein-specific guanine nucleotide-releasing factor 1
27	204748_at	PTGS2	prostaglandin-endoperoxide synthase 2 (prostaglandin G/H synthase and cyclooxygenase)
28	202768_at	FOSB	FBJ murine osteosarcoma viral oncogene homolog B
29	205207_at	IL6	interleukin 6 (interferon, beta 2)
30	205114_s_at	CCL3	chemokine (C-C motif) ligand 3
31	211235_s_at	ESR1	estrogen receptor 1
32	209189_at	FOS	v-fos FBJ murine osteosarcoma viral oncogene homolog
33	211627_x_at	ESR1	estrogen receptor 1
34	207554_x_at	TBXA2R	thromboxane A2 receptor
35	203821_at	HBEGF	heparin-binding EGF-like growth factor
36	212023_s_at	MKI67	antigen identified by monoclonal antibody Ki-67
37	219195_at	PPARGC1A	peroxisome proliferator-activated receptor gamma, coactivator 1 alpha
38	201465_s_at	JUN	jun oncogene
39	205572_at	ANGPT2	angiopoietin 2
40	217190_x_at	ESR1	estrogen receptor 1
41	211377_x_at	MYCN	v-myc myelocytomatosis viral related oncogene, neuroblastoma derived (avian)
42	201466_s_at	JUN	jun oncogene
43	201464_x_at	JUN	jun oncogene
44	201473_at	JUNB	jun B proto-oncogene
45	201693_s_at	EGR1	early growth response 1
46	205225_at	ESR1	estrogen receptor 1
47	211148_s_at	ANGPT2	angiopoietin 2
48	217163_at	ESR1	estrogen receptor 1
49	201044_x_at	DUSP1	dual specificity phosphatase 1
50	207555_s_at	TBXA2R	thromboxane A2 receptor
51	213910_at	IGFBP7	insulin-like growth factor binding protein 7
52	1405_i_at	CCL5	chemokine (C-C motif) ligand 5
53	204655_at	CCL5	chemokine (C-C motif) ligand 5
54	212021_s_at	MKI67	antigen identified by monoclonal antibody Ki-67
CD44 related signatures4 (N=55)
	Probe set	Gene symbol	Description
1	203237_s_at	NOTCH3	Notch homolog 3 (Drosophila)
2	200784_s_at	LRP1	low density lipoprotein-related protein 1 (alpha-2-macroglobulin receptor)
3	204623_at	TFF3	trefoil factor 3 (intestinal)
4	211234_x_at	ESR1	estrogen receptor 1
5	208651_x_at	CD24	CD24 molecule
6	216821_at	KRT8	keratin 8
7	209008_x_at	KRT8	keratin 8
8	209835_x_at	CD44	CD44 molecule (Indian blood group)
9	215552_s_at	ESR1	estrogen receptor 1
10	201162_at	IGFBP7	insulin-like growth factor binding protein 7
11	209602_s_at	GATA3	GATA binding protein 3
12	211233_x_at	ESR1	estrogen receptor 1
13	266_s_at	CD24	CD24 molecule
14	202790_at	CLDN7	claudin 7
15	203238_s_at	NOTCH3	Notch homolog 3 (Drosophila)
16	201163_s_at	IGFBP7	insulin-like growth factor binding protein 7
17	215551_at	ESR1	estrogen receptor 1
18	209292_at	ID4	inhibitor of DNA binding 4, dominant negative helix-loop-helix protein
19	209293_x_at	ID4	inhibitor of DNA binding 4, dominant negative helix-loop-helix protein
20	210930_s_at	ERBB2	v-erb-b2 erythroblastic leukemia viral oncogene homolog 2, neuro/glioblastoma derived oncogene homolog (avian)
21	218182_s_at	CLDN1	claudin 1
22	209604_s_at	GATA3	GATA binding protein 3
23	213869_x_at	THY1	Thy-1 cell surface antigen
24	209603_at	GATA3	GATA binding protein 3
25	212014_x_at	CD44	CD44 molecule (Indian blood group)
26	211235_s_at	ESR1	estrogen receptor 1
27	211695_x_at	MUC1	mucin 1, cell surface associated
28	209291_at	ID4	inhibitor of DNA binding 4, dominant negative helix-loop-helix protein
29	208650_s_at	CD24	CD24 molecule
30	209772_s_at	CD24	CD24 molecule
31	208850_s_at	THY1	Thy-1 cell surface antigen
32	204490_s_at	CD44	CD44 molecule (Indian blood group)
33	207826_s_at	ID3	inhibitor of DNA binding 3, dominant negative helix-loop-helix protein
34	216836_s_at	ERBB2	v-erb-b2 erythroblastic leukemia viral oncogene homolog 2, neuro/glioblastoma derived oncogene homolog (avian)
35	205225_at	ESR1	estrogen receptor 1
36	200670_at	XBP1	X-box binding protein 1
37	203650_at	PROCR	protein C receptor, endothelial (EPCR)
38	200606_at	DSP	desmoplakin
39	213693_s_at	MUC1	mucin 1, cell surface associated
40	201426_s_at	VIM	vimentin
41	211248_s_at	CHRD	chordin
42	205009_at	TFF1	trefoil factor 1
43	204667_at	FOXA1	forkhead box A1
44	207847_s_at	MUC1	mucin 1, cell surface associated
45	213910_at	IGFBP7	insulin-like growth factor binding protein 7
46	202284_s_at	CDKN1A	cyclin-dependent kinase inhibitor 1A (p21, Cip1)
47	204489_s_at	CD44	CD44 molecule (Indian blood group)
48	217523_at	CD44	CD44 molecule (Indian blood group)
49	201596_x_at	KRT18	keratin 18
50	205932_s_at	MSX1	msh homeobox 1
51	221674_s_at	CHRD	chordin
52	208851_s_at	THY1	Thy-1 cell surface antigen
53	201015_s_at	JUP	junction plakoglobin
54	210916_s_at	CD44	CD44 molecule (Indian blood group)
55	200785_s_at	LRP1	low density lipoprotein-related protein 1 (alpha-2-macroglobulin receptor)
Bertucci genes5 (N=71)
	Probe set	Gene symbol	Description
1	203095_at	MTIF2	mitochondrial translational initiation factor 2
2	201151_s_at	MBNL1	muscleblind-like (Drosophila)
3	201318_s_at	MRCL3	myosin regulatory light chain MRCL3
4	202017_at	EPHX1	epoxide hydrolase 1, microsomal (xenobiotic)
5	209953_s_at	CDC37	cell division cycle 37 homolog (S. cerevisiae)
6	204524_at	PDPK1	3-phosphoinositide dependent protein kinase-1
7	204776_at	THBS4	thrombospondin 4
8	208398_s_at	TBPL1	TBP-like 1
9	209721_s_at	IFFO	intermediate filament family orphan
10	203107_x_at	RPS2	ribosomal protein S2
11	208772_at	ANKHD1	ankyrin repeat and KH domain containing 1
12	205459_s_at	NPAS2	neuronal PAS domain protein 2
13	206634_at	SIX3	SIX homeobox 3
14	202138_x_at	JTV1	JTV1 gene
15	211518_s_at	BMP4	bone morphogenetic protein 4
16	221164_x_at	CHST5	carbohydrate (N-acetylglucosamine 6-O) sulfotransferase 5
17	213415_at	CLIC2	chloride intracellular channel 2
18	218190_s_at	UCRC	ubiquinol-cytochrome c reductase complex (7.2 kD)
19	209193_at	PIM1	pim-1 oncogene
20	217956_s_at	ENOPH1	enolase-phosphatase 1
21	207243_s_at	CALM2	calmodulin 2 (phosphorylase kinase, delta)
22	205550_s_at	BRE	brain and reproductive organ-expressed (TNFRSF1A modulator)
23	201522_x_at	SNRPN	small nuclear ribonucleoprotein polypeptide N
24	205410_s_at	ATP2B4	ATPase, Ca++ transporting, plasma membrane 4
25	209040_s_at	PSMB8	proteasome (prosome, macropain) subunit, beta type, 8 (large multifunctional peptidase 7)
26	206996_x_at	CACNB1	calcium channel, voltage-dependent, beta 1 subunit
27	213795_s_at	PTPRA	protein tyrosine phosphatase, receptor type, A
28	205549_at	PCP4	Purkinje cell protein 4
29	207897_at	CRHR2	corticotropin releasing hormone receptor 2
30	210119_at	KCNJ15	potassium inwardly-rectifying channel, subfamily J, member 15
31	204917_s_at	MLLT3	myeloid/lymphoid or mixed-lineage leukemia (trithorax homolog, Drosophila); translocated to, 3
32	202205_at	VASP	vasodilator-stimulated phosphoprotein
33	202838_at	FUCA1	fucosidase, alpha-L- 1, tissue
34	200715_x_at	RPL13A	ribosomal protein L13a
35	203683_s_at	VEGFB	vascular endothelial growth factor B
36	205725_at	SCGB1A1	secretoglobin, family 1A, member 1 (uteroglobin)
37	206040_s_at	MAPK11	mitogen-activated protein kinase 11
38	205077_s_at	PIGF	phosphatidylinositol glycan anchor biosynthesis, class F
39	201516_at	SRM	spermidine synthase
40	204148_s_at	POMZP3	POM (POM121 homolog, rat) and ZP3 fusion
41	201910_at	FARP1	FERM, RhoGEF (ARHGEF) and pleckstrin domain protein 1 (chondrocyte-derived)
42	201303_at	EIF4A3	eukaryotic translation initiation factor 4A, isoform 3
43	205991_s_at	PRRX1	paired related homeobox 1
44	211986_at	AHNAK	AHNAK nucleoprotein
45	203821_at	HBEGF	heparin-binding EGF-like growth factor
46	202891_at	NIT1	nitrilase 1
47	200651_at	GNB2L1	guanine nucleotide binding protein (G protein), beta polypeptide 2-like 1
48	207791_s_at	RAB1A	RAB1A, member RAS oncogene family
49	206353_at	COX6A2	cytochrome c oxidase subunit VIa polypeptide 2
50	213110_s_at	COL4A5	collagen, type IV, alpha 5
51	204983_s_at	GPC4	glypican 4
52	208351_s_at	MAPK1	mitogen-activated protein kinase 1
53	210828_s_at	ARNT	aryl hydrocarbon receptor nuclear translocator
54	201946_s_at	CCT2	chaperonin containing TCP1, subunit 2 (beta)
55	203718_at	PNPLA6	patatin-like phospholipase domain containing 6
56	200046_at	DAD1	defender against cell death 1
57	208645_s_at	RPS14	ribosomal protein S14
58	203868_s_at	VCAM1	vascular cell adhesion molecule 1
59	221700_s_at	UBA52	ubiquitin A-52 residue ribosomal protein fusion product 1
60	206203_at	RCVRN	recoverin
61	201390_s_at	CSNK2B	casein kinase 2, beta polypeptide
62	218159_at	C20orf116	chromosome 20 open reading frame 116
63	208522_s_at	PTCH1	patched homolog 1 (Drosophila)
64	209303_at	NDUFS4	NADH dehydrogenase (ubiquinone) Fe-S protein 4, 18kDa (NADH-coenzyme Q reductase)
65	206944_at	HTR6	5-hydroxytryptamine (serotonin) receptor 6
66	205896_at	SLC22A4	solute carrier family 22 (organic cation/ergothioneine transporter), member 4
67	203401_at	PRPS2	phosphoribosyl pyrophosphate synthetase 2
68	201088_at	KPNA2	karyopherin alpha 2 (RAG cohort 1, importin alpha 1)
69	200703_at	DYNLL1	dynein, light chain, LC8-type 1
70	201290_at	SEC11A	SEC11 homolog A (S. cerevisiae)
71	202769_at	CCNG2	cyclin G2
