# Supplementary material for: Different gene expressions are associated with the different molecular subtypes of inflammatory breast cancer
Source: Springer Nature journal article supplement (doi:10.1007/s10549-010-1280-6), 2010-12-08
Supplement: MOESM4 [file 10549_2010_1280_MOESM4_ESM.xls]

## Sheet: ALL
Supplementary Table 4-1. Significant gene sets in all patients (Efron-Tibshirani's GSA test P-value≤0.01)
	GO category	GO term	Number of genes	Efron-Tibshirani's GSA test P value	Direction
1	GO:0051668	Localization within membrane	15	0.001	IBC
2	GO:0042743	Hydrogen peroxide metabolic process	29	0.001	IBC
3	GO:0043407	Negative regulation of MAP kinase activity	40	0.001	IBC
4	GO:0051259	Protein oligomerization	97	0.001	IBC
5	GO:0005548	Phospholipid transporter activity	35	0.003	IBC
6	GO:0030833	Regulation of actin filament polymerization	71	0.003	IBC
7	GO:0030041	Actin filament polymerization	81	0.003	IBC
8	GO:0002720	Positive regulation of cytokine production during immune response	13	0.005	IBC
9	GO:0030837	Negative regulation of actin filament polymerization	46	0.005	IBC
10	GO:0008064	Regulation of actin polymerization or depolymerization	79	0.005	IBC
11	GO:0006469	Negative regulation of protein kinase activity	84	0.005	IBC
12	GO:0033673	Negative regulation of kinase activity	86	0.005	IBC
13	GO:0002702	P[ositive regulation of production of molecular mediator of immune response	15	0.006	IBC
14	GO:0004659	Prenyltransferase activity	18	0.006	IBC
15	GO:0008154	Actin polymerization or depolymerization	97	0.006	IBC
16	GO:0032272	Negative regulation of protein polymerization	48	0.007	IBC
17	GO:0032535	Regulation of cellular component size	88	0.007	IBC
18	GO:0043506	Regulation of JUN kinase activity	29	0.008	IBC
19	GO:0030832	Regulation of actin filament length	86	0.008	IBC
20	GO:0043488	Regulation of mRNA stability	25	0.009	IBC
21	GO:0033549	MAP kinase phosphatase activity	12	0.01	IBC
22	GO:0002718	Regulation of cytokine production during immune response	22	0.01	IBC
23	GO:0060326	Cell chemotaxis	45	0.01	IBC
24	GO:0007602	Phototransduction	19	0.001	Non-IBC
25	GO:0050962	Detection of light stimulus involved in sensory perception	20	0.001	Non-IBC
26	GO:0009584	Detection of visible light	21	0.001	Non-IBC
27	GO:0009583	Detection of light stimulus	23	0.001	Non-IBC
28	GO:0048663	Neuron fate commitment	29	0.001	Non-IBC
29	GO:0048839	Inner ear development	36	0.001	Non-IBC
30	GO:0009582	Detection of abiotic stimulus	45	0.001	Non-IBC
31	GO:0043583	Ear development	49	0.001	Non-IBC
32	GO:0007548	Sex differentiation	99	0.001	Non-IBC
33	GO:0009581	Detection of external stimulus	47	0.003	Non-IBC
34	GO:0048565	Gut development	26	0.004	Non-IBC
35	GO:0019840	Isoprenoid binding	13	0.006	Non-IBC
36	GO:0048385	Regulation of retinoic acid receptor signaling pathway	14	0.006	Non-IBC
37	GO:0032182	Small conjugating protein binding	45	0.006	Non-IBC
38	GO:0048469	Cell maturation	57	0.006	Non-IBC
39	GO:0060173	Limb development	78	0.006	Non-IBC
40	GO:0016799	Hydrolase activity, hydrolyzing N-glycosyl compounds	21	0.007	Non-IBC
41	GO:0048384	Retinoic acid receptor signaling pathway	27	0.007	Non-IBC
42	GO:0042490	Mechanoreceptor differentiation	14	0.008	Non-IBC
43	GO:0019203	Carbohydrate phosphatase activity	10	0.009	Non-IBC
44	GO:0006825	Copper ion transport	13	0.01	Non-IBC
§the Efron and Tibshirani gene set analysis method that employs “maxmean” statistics (under 1000 permutations);

## Sheet: ER+
Supplementary Table 4-2. Significant gene sets in ER+HER2- (Efron-Tibshirani's GSA test P value≤0.01)
	GO category	GO term	Number of genes	Efron-Tibshirani's GSA test P value	Direction
1	GO:0002675	Positive regulation of acute inflammatory response	11	0.001	IBC
2	GO:0002673	Regulation of acute inflammatory response	15	0.001	IBC
3	GO:0050729	Positive regulation of inflammatory response	31	0.001	IBC
4	GO:0050727	Regulation of inflammatory response	57	0.002	IBC
5	GO:0043407	Negative regulation of MAP kinase activity	40	0.003	IBC
6	GO:0031406	Carboxylic acid binding	17	0.005	IBC
7	GO:0045103	Intermediate filament-based process	25	0.005	IBC
8	GO:0010574	Regulation of vascular endothelial growth factor production	17	0.006	IBC
9	GO:0045104	Intermediate filament cytoskeleton organization	23	0.006	IBC
10	GO:0046928	Regulation of neurotransmitter secretion	12	0.007	IBC
11	GO:0033549	MAP kinase phosphatase activity	12	0.008	IBC
12	GO:0043500	Muscle adaptation	20	0.008	IBC
13	GO:0002526	Acute inflammatory response	97	0.008	IBC
14	GO:0014896	Muscle hypertrophy	15	0.009	IBC
15	GO:0042531	Positive regulation of tyrosine phosphorylation of STAT protein	22	0.009	IBC
16	GO:0051348	Negative regulation of transferase activity	92	0.009	IBC
17	GO:0033673	Negative regulation of kinase activity	86	0.01	IBC
18	GO:0009250	Glucan biosynthetic process	17	0.001	Non-IBC
19	GO:0006476	Protein amino acid deacetylation	23	0.002	Non-IBC
20	GO:0017156	Calcium ion-dependent exocytosis	17	0.003	Non-IBC
21	GO:0033558	Protein deacetylase activity	23	0.004	Non-IBC
22	GO:0016755	Transferase activity, transferring amino-acyl groups	16	0.005	Non-IBC
23	GO:0016307	Phosphatidylinositol phosphate kinase activity	14	0.007	Non-IBC
24	GO:0042440	Pigment metabolic process	66	0.008	Non-IBC
25	GO:0030295	Protein kinase activator activity	16	0.009	Non-IBC
26	GO:0002839	Positive regulation of immune response to tumor cell	15	0.01	Non-IBC
27	GO:0019213	Deacetylase activity	27	0.01	Non-IBC
28	GO:0034101	Erythrocyte homeostasis	77	0.01	Non-IBC
§the Efron and Tibshirani gene set analysis method that employs “maxmean” statistics (under 1000 permutations);

## Sheet: HER2+
Supplementary Table 4-3. Significant gene sets in HER2+ (Efron-Tibshirani's GSA test P value≤0.01)
	GO category	GO term	Number of genes	Efron-Tibshirani's GSA test P value	Direction
1	GO:0051668	Localization within membrane	15	0.001	IBC
2	GO:0051084	'de novo' posttranslational protein folding	15	0.001	IBC
3	GO:0009119	Ribonucleoside metabolic process	15	0.001	IBC
4	GO:0043681	Protein import into mitochondrion	16	0.001	IBC
5	GO:0009168	Purine ribonucleoside monophosphate biosynthetic process	22	0.001	IBC
6	GO:0006458	'de novo' protein folding	23	0.001	IBC
7	GO:0019206	Nucleoside kinase activity	23	0.001	IBC
8	GO:0042994	Cytoplasmic sequestering of transcription factor	11	0.002	IBC
9	GO:0006626	Protein targeting to mitochondrion	30	0.002	IBC
10	GO:0009116	Nucleoside metabolic process	41	0.002	IBC
11	GO:0003729	mRNA binding	90	0.002	IBC
12	GO:0043094	Cellular metabolic compound salvage	10	0.003	IBC
13	GO:0051220	Cytoplasmic sequestering of protein	14	0.003	IBC
14	GO:0022884	Macromolecule transmembrane transporter activity	15	0.003	IBC
15	GO:0042273	Ribosomal large subunit biogenesis	18	0.003	IBC
16	GO:0010466	Negative regulation of peptidase activity	21	0.003	IBC
17	GO:0005758	Mitochondrial intermembrane space	34	0.003	IBC
18	GO:0046128	Purine ribonucleoside metabolic process	13	0.004	IBC
19	GO:0019201	Nucleotide kinase activity	30	0.004	IBC
20	GO:0008344	Adult locomotory behavior	35	0.004	IBC
21	GO:0019059	Initiation of viral infection	42	0.004	IBC
22	GO:0006446	Regulation of translational initiation	72	0.004	IBC
23	GO:0015935	Small ribosomal subunit	89	0.004	IBC
24	GO:0030159	Receptor signaling complex scaffold activity	24	0.005	IBC
25	GO:0031970	Organelle envelope lumen	41	0.005	IBC
26	GO:0046148	Pigment biosynthetic process	54	0.007	IBC
27	GO:0015934	Large ribosomal subunit	99	0.007	IBC
28	GO:0006144	Purine base metabolic process	24	0.008	IBC
29	GO:0009146	Purine nucleoside triphosphate catabolic process	13	0.009	IBC
30	GO:0042274	Ribosomal small subunit biogenesis	22	0.009	IBC
31	GO:0009161	Ribonucleoside monophosphate metabolic process	33	0.009	IBC
32	GO:0006195	Purine nucleotide catabolic process	20	0.01	IBC
33	GO:0030041	Actin filament polymerization	81	0.01	IBC
34	GO:0050982	Detection of mechanical stimulus	14	0.001	Non-IBC
35	GO:0004434	Inositol or phosphatidylinositol phosphodiesterase activity	29	0.001	Non-IBC
36	GO:0045761	Regulation of adenylate cyclase activity	92	0.002	Non-IBC
37	GO:0031279	Regulation of cyclase activity	94	0.002	Non-IBC
38	GO:0051339	Regulation of lyase activity	95	0.002	Non-IBC
39	GO:0015491	Cation:cation antiporter activity	15	0.003	Non-IBC
40	GO:0004629	Phospholipase C activity	32	0.003	Non-IBC
41	GO:0008543	Fibroblast growth factor receptor signaling pathway	41	0.003	Non-IBC
42	GO:0048706	Embryonic skeletal system development	53	0.003	Non-IBC
43	GO:0030817	Regulation of cAMP biosynthetic process	100	0.003	Non-IBC
44	GO:0030574	Collagen catabolic process	27	0.004	Non-IBC
45	GO:0044243	Multicellular organismal catabolic process	29	0.005	Non-IBC
46	GO:0009953	Dorsal/ventral pattern formation	32	0.005	Non-IBC
47	GO:0009612	Response to mechanical stimulus	40	0.005	Non-IBC
48	GO:0050906	Detection of stimulus involved in sensory perception	41	0.005	Non-IBC
49	GO:0007190	Activation of adenylate cyclase activity	42	0.005	Non-IBC
50	GO:0009582	Detection of abiotic stimulus	45	0.005	Non-IBC
51	GO:0009581	Detection of external stimulus	47	0.005	Non-IBC
52	GO:0048609	Reproductive process in a multicellular organism	84	0.005	Non-IBC
53	GO:0021536	Diencephalon development	21	0.006	Non-IBC
54	GO:0042471	Ear morphogenesis	31	0.006	Non-IBC
55	GO:0048704	Embryonic skeletal system morphogenesis	36	0.006	Non-IBC
56	GO:0033267	Axon part	12	0.007	Non-IBC
57	GO:0006939	Smooth muscle contraction	44	0.007	Non-IBC
58	GO:0042166	Acetylcholine binding	22	0.008	Non-IBC
59	GO:0048839	Inner ear development	36	0.008	Non-IBC
60	GO:0005179	Hormone activity	77	0.008	Non-IBC
61	GO:0005929	Cilium	98	0.008	Non-IBC
62	GO:0008021	Synaptic vesicle	40	0.009	Non-IBC
63	GO:0048469	Cell maturation	57	0.009	Non-IBC
64	GO:0051606	Detection of stimulus	80	0.009	Non-IBC
65	GO:0016775	Phosphotransferase activity, nitrogenous group as acceptor	10	0.01	Non-IBC
66	GO:0016248	Channel inhibitor activity	12	0.01	Non-IBC
67	GO:0050974	Detection of mechanical stimulus involved in sensory perception	13	0.01	Non-IBC
68	GO:0032369	Negative regulation of lipid transport	19	0.01	Non-IBC
69	GO:0044236	Multicellular organismal metabolic process	57	0.01	Non-IBC
§the Efron and Tibshirani gene set analysis method that employs “maxmean” statistics (under 1000 permutations);

## Sheet: ER-
Supplementary Table 4-4. Significant gene sets in ER-HER2- (Efron-Tibshirani's GSA test* P value≤0.01)
	GO category	GO term	Number of genes	Efron-Tibshirani's GSA test P value	Direction
1	GO:0035094	Response to nicotine	19	0.001	IBC
2	GO:0043279	Response to alkaloid	27	0.001	IBC
3	GO:0005548	Phospholipid transporter activity	35	0.001	IBC
4	GO:0048545	Response to steroid hormone stimulus	97	0.001	IBC
5	GO:0006800	Oxygen and reactive oxygen species metabolic process	78	0.002	IBC
6	GO:0002437	Inflammatory response to antigenic stimulus	14	0.003	IBC
7	GO:0005100	Rho GTPase activator activity	26	0.003	IBC
8	GO:0014902	Myotube differentiation	16	0.004	IBC
9	GO:0016528	Sarcoplasm	34	0.004	IBC
10	GO:0008367	Bacterial binding	12	0.005	IBC
11	GO:0014070	Response to organic cyclic substance	37	0.006	IBC
12	GO:0043627	Response to estrogen stimulus	62	0.006	IBC
13	GO:0002861	Regulation of inflammatory response to antigenic stimulus	13	0.007	IBC
14	GO:0048019	Receptor antagonist activity	14	0.008	IBC
15	GO:0016529	Sarcoplasmic reticulum	33	0.008	IBC
16	GO:0007631	Feeding behavior	41	0.008	IBC
17	GO:0002683	Negative regulation of immune system process	71	0.009	IBC
18	GO:0006656	Phosphatidylcholine biosynthetic process	13	0.01	IBC
19	GO:0042752	Regulation of circadian rhythm	10	0.001	Non-IBC
20	GO:0012507	ER to Golgi transport vesicle membrane	11	0.001	Non-IBC
21	GO:0030134	ER to Golgi transport vesicle	15	0.001	Non-IBC
22	GO:0042116	Macrophage activation	22	0.002	Non-IBC
23	GO:0000781	Chromosome, telomeric region	33	0.002	Non-IBC
24	GO:0000152	Nuclear ubiquitin ligase complex	28	0.003	Non-IBC
25	GO:0005791	Rough endoplasmic reticulum	23	0.004	Non-IBC
26	GO:0050136	NADH dehydrogenase (quinone) activity	39	0.004	Non-IBC
27	GO:0019104	DNA N-glycosylase activity	17	0.005	Non-IBC
28	GO:0030947	Regulation of vascular endothelial growth factor receptor signaling pathway	16	0.006	Non-IBC
29	GO:0006195	Purine nucleotide catabolic process	20	0.006	Non-IBC
30	GO:0051920	Peroxiredoxin activity	11	0.007	Non-IBC
31	GO:0033014	Tetrapyrrole biosynthetic process	24	0.007	Non-IBC
32	GO:0045271	Respiratory chain complex I	40	0.007	Non-IBC
33	GO:0046165	Alcohol biosynthetic process	45	0.007	Non-IBC
34	GO:0001936	Regulation of endothelial cell proliferation	47	0.007	Non-IBC
35	GO:0005761	Mitochondrial ribosome	37	0.008	Non-IBC
36	GO:0016655	Oxidoreductase activity, acting on NADH or NADPH, quinone or similar compound as acceptor	45	0.008	Non-IBC
37	GO:0030867	Rough endoplasmic reticulum membrane	14	0.009	Non-IBC
38	GO:0006783	Heme biosynthetic process	22	0.009	Non-IBC
39	GO:0005048	Signal sequence binding	46	0.009	Non-IBC
40	GO:0051540	Metal cluster binding	54	0.009	Non-IBC
41	GO:0005746	Mitochondrial respiratory chain	68	0.009	Non-IBC
*the Efron and Tibshirani gene set analysis method that employs “maxmean” statistics (under 1000 permutations);
